# Supplementary material for: Single-photon ionization of SiC in the gas phase: experimental and ab initio characterization of SiC+
Source: Royal Society of Chemistry journal article supplement (doi:10.1039/d3cp02775a), 2023-01-01
Supplement: d3cp02775a1.pdf [file d3cp02775a1.pdf]

Cite this: DOI: 00.0000/xxxxxxxxxx

## Supplementary Information – Single-photon ionization of SiC in the gas phase: experimental and *ab initio* characterizations of SiC<sup>+</sup>

B. Gans,<sup>\*a</sup> J. Liévin,<sup>b</sup> P. Halvick,<sup>c</sup> N. L. Chen,<sup>a</sup> S. Boyé-Péronne,<sup>a</sup> S. Hartweg,<sup>d‡</sup> G.A. Garcia,<sup>d</sup> and J.C. Loison<sup>c</sup>

Received Date  
Accepted Date

DOI: 00.0000/xxxxxxxxxx

### 1 Effect of the core and core-valence correlation and of the basis set on the 1<sup>+</sup>2<sup>+</sup>Π electronic state potential energy curve

In this section, we discuss the 1<sup>+</sup>2<sup>+</sup>Π double well shape, when going from *V*/AV5Z to *CV*/ACV6Z calculations. As shown in the left panel of Figure S1, the lowest minimum moves from the larger internuclear distance (1.94 Å) to the smaller one (1.74 Å). As a consequence the lowest vibrational levels are shifted to lower energies and the maximum vibrational overlaps occur at shorter distances, *i.e.* closer to the minima of the X and a states of SiC. The result of these changes on the calculated photoelectron spectra is illustrated in the right panels of Figure S1. Apart from a slight red shift of about 40 meV of both transitions, this does not change our conclusion in the main paper concerning a "matching" with the experimental photoelectron spectrum for the 1<sup>+</sup>2<sup>+</sup>Π ← X<sup>3</sup>Π transition, and an "unmatching" for the 1<sup>+</sup>2<sup>+</sup>Π ← a<sup>1</sup>Σ<sup>+</sup> transition.

### 2 Procedure used for estimating the photoionization probabilities

Table S1 gives, for the different states of SiC and SiC<sup>+</sup>, the weights *w* of the main configurations involved in single electron ionization processes. These weights correspond to the squares of the CI coefficients of the considered configurations in the MRCI/AV5Z wave functions obtained at *R* = 1.72 Å, close to the

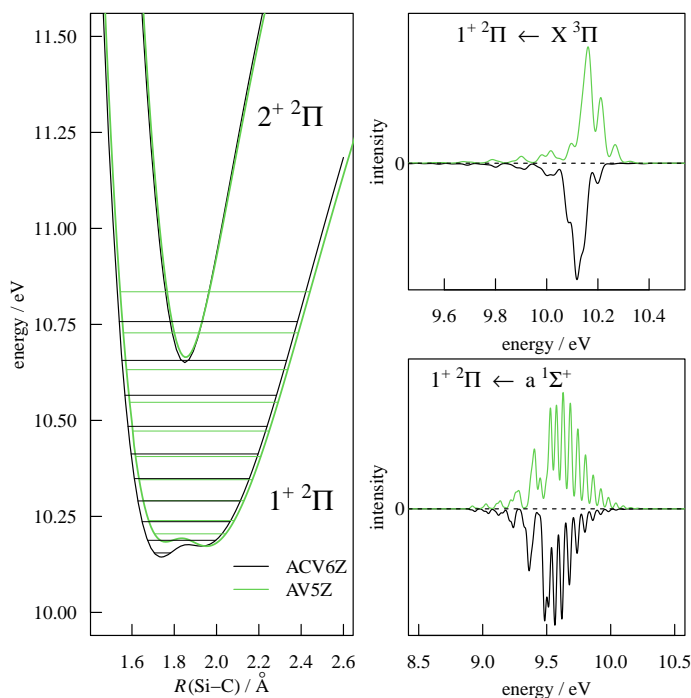

Fig. S1 On the left side, potential energy curves of the first two 2<sup>+</sup>Π states of SiC<sup>+</sup> computed at the MRCI+Q/AV5Z (in green) and MRCI+Q/ACV6Z (in black) levels of theory. On the right side, corresponding calculated photoelectron spectra for the 1<sup>+</sup>2<sup>+</sup>Π ← X<sup>3</sup>Π and 1<sup>+</sup>2<sup>+</sup>Π ← a<sup>1</sup>Σ<sup>+</sup> transitions using the same color code.

\* Corresponding author: berenger.gans@universite-paris-saclay.fr

<sup>a</sup> Institut des Sciences Moléculaires d'Orsay, CNRS, Université Paris-Saclay, F-91405 Orsay, France

<sup>b</sup> Spectroscopy, Quantum Chemistry and Atmospheric Remote Sensing, Université Libre de Bruxelles, CP 160/09, B-1050 Bruxelles, Belgium

<sup>c</sup> Institut des Sciences Moléculaires, CNRS, Université de Bordeaux, F-33400 Talence, France

<sup>d</sup> Synchrotron SOLEIL, L'Orme des Merisiers, St. Aubin, F-91192 Gif sur Yvette, France  
‡ current address: Institute of Physics, University of Freiburg, 79104 Freiburg, Germany

ground state geometry of SiC. Let us note that in the case of the  $2^+2\Pi$  state, the main configuration with  $w= 0.77$  does not obey the single electron ejection condition, and does not therefore contribute to the photoionization. The secondary configuration obeys the condition, but with a negligible weight.

The probabilities  $P$  of the photoionizing transitions are provided in Table S2. They are given by the formula:  $P = w_n \cdot w_c \cdot g_n \cdot g_c$ , where  $w_n$  and  $w_c$  are the weights for the neutral and the cation, respectively, and  $g_n$  and  $g_c$  are the corresponding degeneracies, including the orbital and spin contributions.  $P_{\text{norm.}}$  are the probabilities normalized with respect to the main  $X^+4\Sigma^- \leftarrow X^3\Pi$  photoionizing transition.

Table S1 Main configurations and their corresponding weights ( $w$ ) for the different states of SiC and SiC<sup>+</sup> involved in photoionizing transitions implying single electron ejection.

| State          | $w$   | Main configuration            |
|----------------|-------|-------------------------------|
| $X^3\Pi$       | 0.77  | [...]7 $\sigma^1$ 2 $\pi^3$   |
| $a^1\Sigma^+$  | 0.71  | [...]7 $\sigma^0$ 2 $\pi^4$   |
| $X^+4\Sigma^-$ | 0.87  | [...]7 $\sigma^1$ 2 $\pi^2$   |
| $1^+2\Delta$   | 0.85  | [...]7 $\sigma^1$ 2 $\pi^2$   |
| $1^+2\Pi$      | 0.71  | [...]7 $\sigma^0$ 2 $\pi^3$   |
| $1^+2\Sigma^-$ | 0.86  | [...]7 $\sigma^1$ 2 $\pi^2$   |
| $1^+2\Sigma^+$ | 0.82  | [...]7 $\sigma^1$ 2 $\pi^2$   |
| $2^+2\Pi$      | 0.77* | [...]7 $\sigma^2$ 2 $\pi^1$ * |
|                | 0.04  | [...]7 $\sigma^0$ 2 $\pi^3$   |

\* The main configuration does not lead to ionization (see text).

Table S2 Pertinent parameters for the photoionization probabilities of each photoionizing transitions used in the calculated photoelectron spectrum of Fig. 5 of the main paper.

| Transitions                      | $w_n$ | $w_c$ | $g_n$ | $g_c$ | $P$  | $P_{\text{norm.}}^*$ |
|----------------------------------|-------|-------|-------|-------|------|----------------------|
| $X^+4\Sigma^- \leftarrow X^3\Pi$ | 0.77  | 0.87  | 6     | 4     | 16.2 | 1.0                  |
| $1^+2\Delta \leftarrow X^3\Pi$   | 0.77  | 0.85  | 6     | 4     | 15.8 | 1.0                  |
| $1^+2\Pi \leftarrow X^3\Pi$      | 0.77  | 0.71  | 6     | 4     | 13.2 | 0.8                  |
| $1^+2\Sigma^- \leftarrow X^3\Pi$ | 0.77  | 0.86  | 6     | 2     | 8.0  | 0.5                  |
| $1^+2\Sigma^+ \leftarrow X^3\Pi$ | 0.77  | 0.82  | 6     | 2     | 7.6  | 0.5                  |
| $2^+2\Pi \leftarrow X^3\Pi$      | 0.77  | 0.04  | 6     | 4     | 0.8  | 0.0                  |
| $1^+2\Pi \leftarrow a^1\Sigma^+$ | 0.71  | 0.71  | 1     | 4     | 2.0  | 0.1                  |

\* Normalized probability.
